# Supplementary material
Source: publisher site journal article supplement (https://www.dovepress.com/article/238332)
Supplement: Supplementary file 1 [file get_supplementary_file.php]

Figure S1


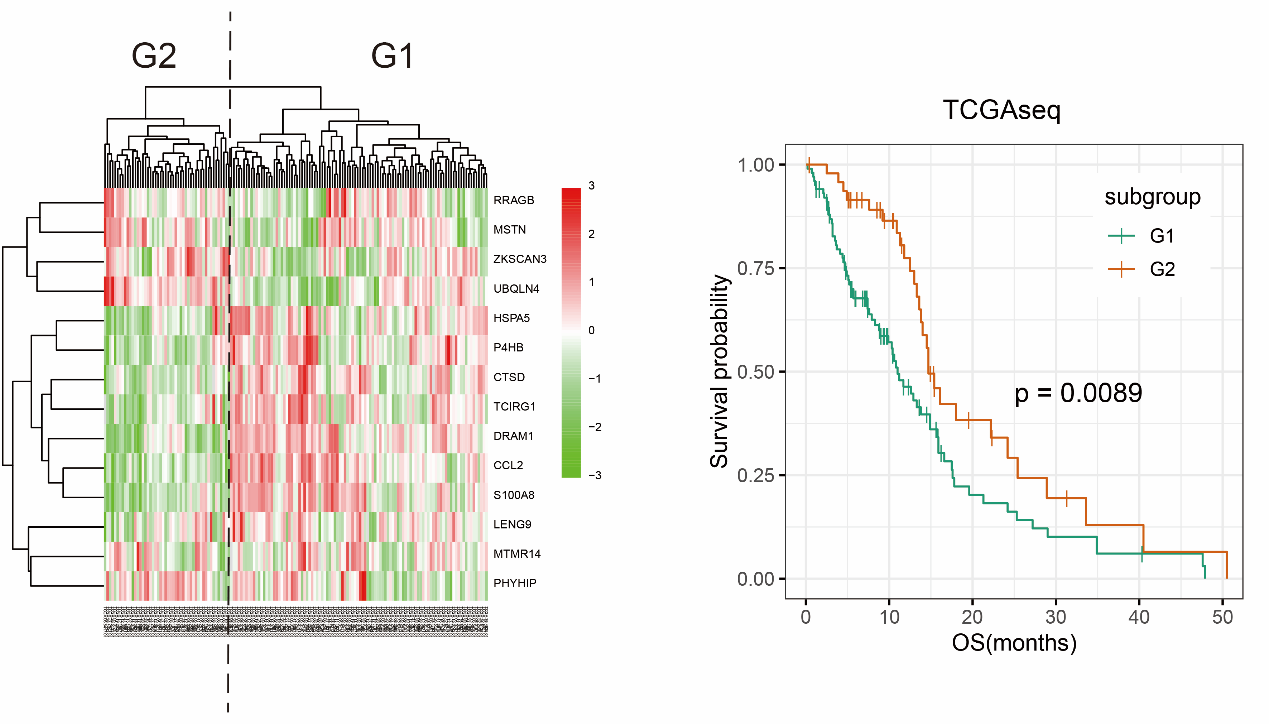


**Figure S1. A** COX univariate analysis screened out 14 genes and grouped TCGA glioblastoma patients into two groups. **B** The prognosis of the two groups in TCGA was significantly different (p = 0.0023).

Figure S2
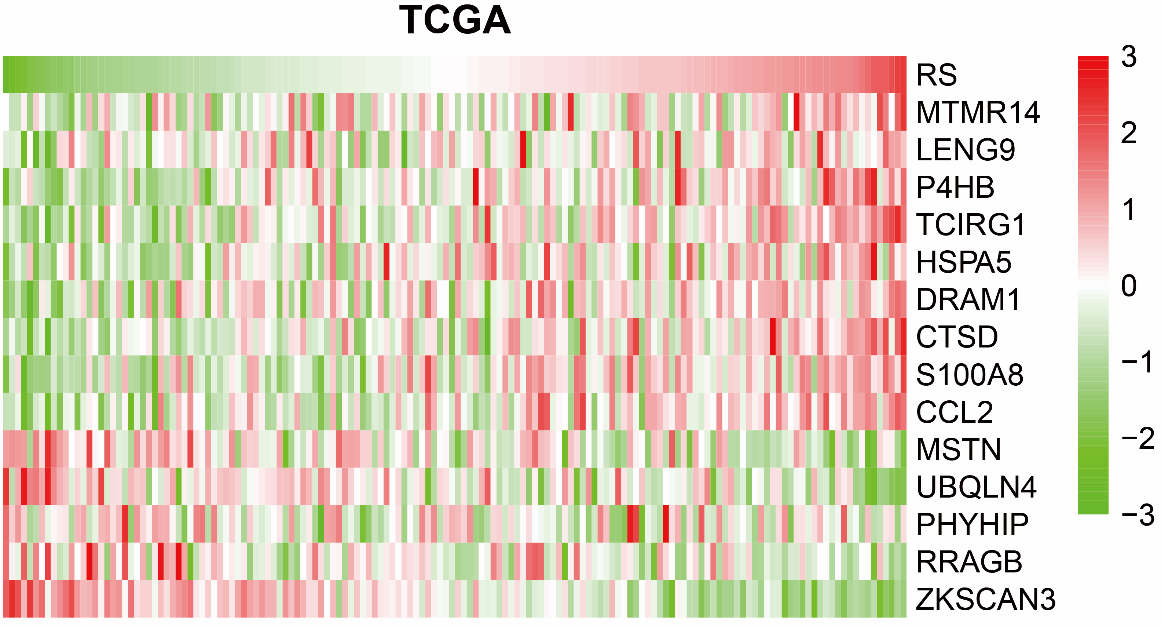


**Figure S2**. The expression pattern of 14 genes in TCGA database. The top nine genes increased with risk score, while next five genes were reversed.

Figure S3


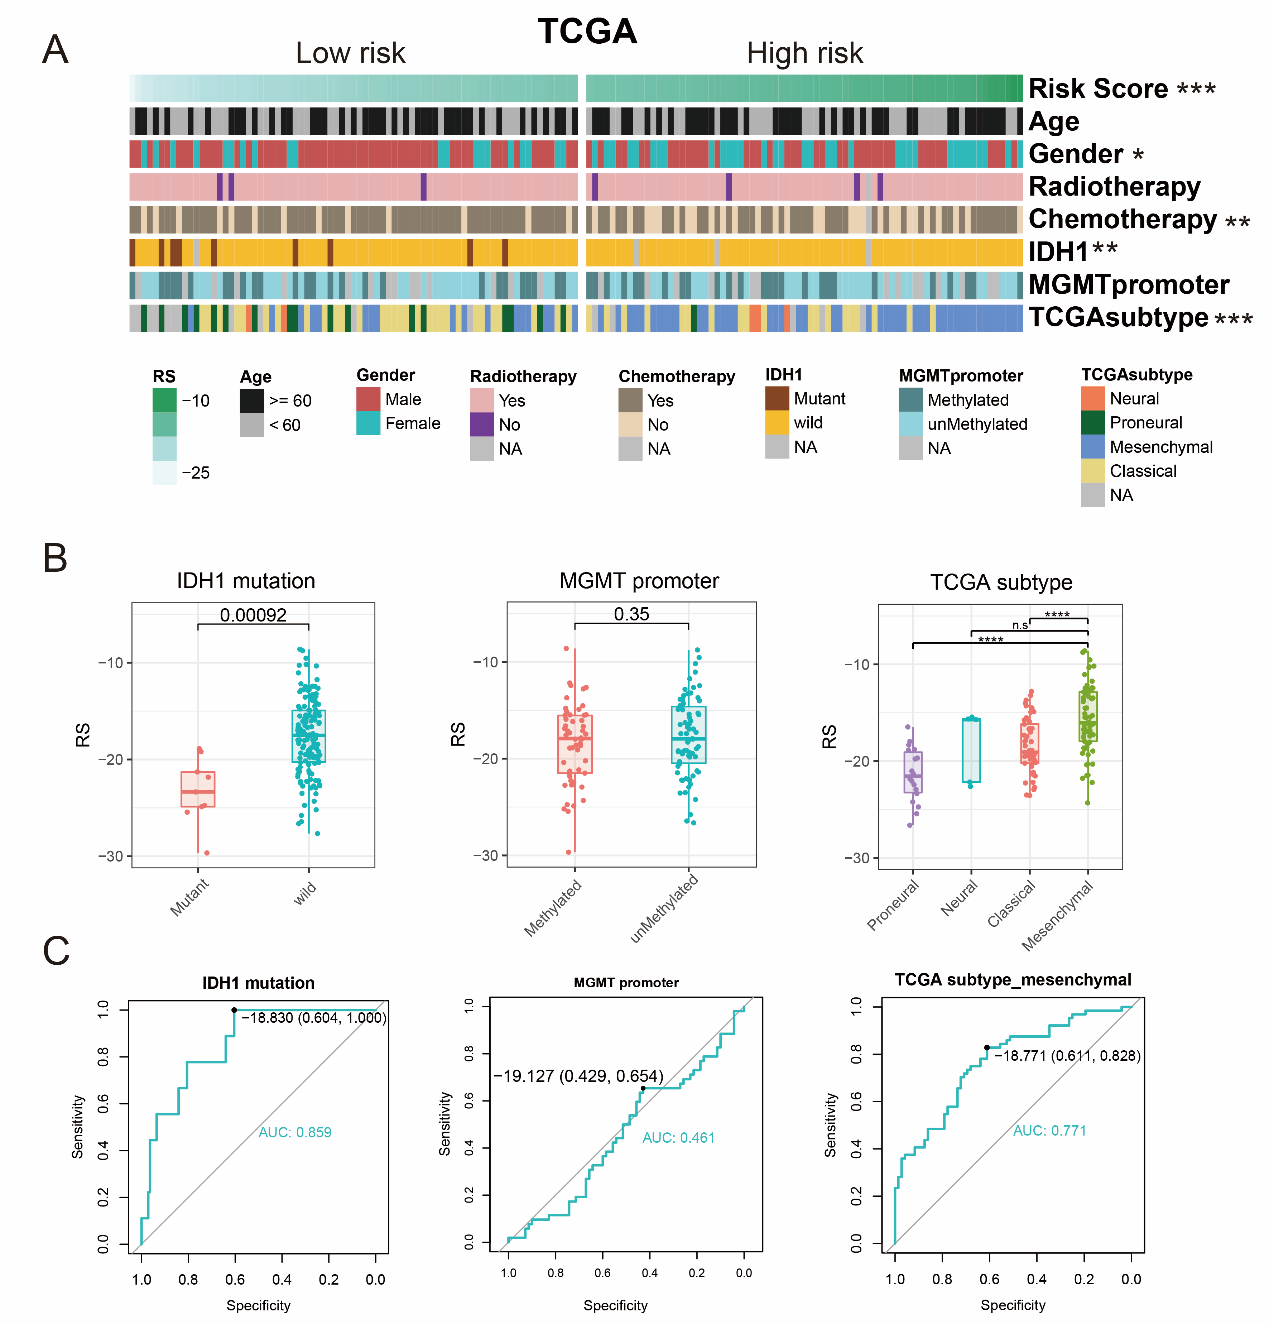


**Figure S3**. **Correlation between signature risk score and clinicopathology in TCGA dataset. A** The clinicopathologic information of 152 glioblastoma patients in TCGA. Patients were arranged by the increasing risk score and divided into two groups based on median risk score. **P < 0.01, ***P < 0.001, ****P < 0.0001. **B** Distribution of the risk score in patients stratified by IDH1 status, MGMT promoter methylation, and TCGA subtypes. **C** ROC curve was utilized to evaluate the predictive efficacy of risk score for IDH1 mutation, MGMT promoter methylation, and TCGA mesenchymal subtypes. IDH1, isocitrate dehydrogenase 1; MGMT, methylguanine methyltransferase; TCGA, The Cancer Genome Atlas.

| Table S1. Clinicopathological factors of glioblastoma patients in TCGA cohorts. | | | |
| --- | --- | --- | --- |
| Features | Low-risk score | High-risk score | P-value |
| (n=76) | (n=76) |
| Age |  |  |  |
| Mean (range) | 60(21-89) | 62(24-85) | 0.090 |
| Gender |  |  |  |
| Female | 20 | 34 | 0.028 |
| Male | 56 | 42 |  |
| TCGA subtype |  |  |  |
| Pro | 17 | 1 | <0.001 |
| Neural | 2 | 3 |  |
| Classical | 30 | 19 |  |
| Mes | 16 | 48 |  |
| NA | 11 | 5 |  |
| IDH1 status |  |  |  |
| WT | 66 | 73 | <0.01 |
| Mut | 9 | 0 |  |
| NA | 1 | 3 |  |
| MGMT promoter status |  |  |  |
| Unmethy | 35 | 35 | 1.000 |
| Methy | 26 | 26 |  |
| NA | 15 | 15 |  |
| Radiotherapy |  |  |  |
| Yes | 73 | 71 | 0.719 |
| No | 3 | 4 |  |
| NA | 0 | 1 |  |
| Chemotherapy |  |  |  |
| Yes | 63 | 45 | <0.01 |
| No | 13 | 30 |  |
| NA | 0 | 1 |  |

Table S2 Gene ontology (GO) analysis of signature positively related genes.

Table S3 Gene ontology (GO) analysis of signature negatively related genes.

Table S4 GSEA report for enrichment in high-risk group.

Table S5 GSEA report for enrichment in low-risk group.

Table S6 Immune scores, stromal scores, ESTIMATE scores, and tumor purity for 138 glioblastoma patients from CGGA.

Table S7 Immune scores, stromal scores, ESTIMATE scores, and tumor purity for 152 glioblastoma patients from TCGA.
